# Supplementary material for: Impact of a 5-Year Mass Drug Administration Programme for Soil-Transmitted Helminthiases on the Spatial Distribution of Childhood Anaemia in Burundi from 2007 to 2011
Source: MDPI journal article supplement (doi:10.3390/tropicalmed7100307), 2022-10-17
Supplement: s1 [file s1]

## Annex

### Tables:

*Table S1 : Anaemia severity thresholds (blood haemoglobin concentration).*

| Population age groups and status | Non-anaemic (g/l) | Low severity (g/l) | Moderate severity (g/l) | High severity (g/l) |
|----------------------------------|-------------------|--------------------|-------------------------|---------------------|
| 5–11yrs                          | ≥115              | 110–114            | 80–109                  | <80                 |
| 12–14yrs                         | ≥120              | 110–119            | 80–109                  | <80                 |
| Non-pregnant women aged ≥15yrs   | ≥120              | 110–119            | 80–109                  | <80                 |
| Pregnant women aged ≥15yrs       | ≥110              | 100–109            | 70–99                   | <70                 |
| Men aged ≥15yrs                  | ≥130              | 110–129            | 80–109                  | <80                 |

Classification is according to the World Health Organization guidelines [33].

*Table S2: Results of semivariogram parameters for the prevalence of anaemia, and the prevalence of anaemia severity in Burundi per year, 2008–2011.*

| Year                    | Raw anaemia | Anaemia residuals | Low severity | Moderate/high severity |
|-------------------------|-------------|-------------------|--------------|------------------------|
| <b>2008</b>             |             |                   |              |                        |
| Spatial autocorrelation | None        | Trended           | Clustered    | Clustered              |
| Nugget                  | 0.0712379   | 0.00469545        | 0            | 0                      |
| Sill                    | 0           | 0.008014904       | 0.008307482  | 0.01295277             |
| Range                   | 1.180104    | 0.9034204         | 0.5694854    | 0.3049023              |
| <b>2009</b>             |             |                   |              |                        |
| Spatial autocorrelation | Trended     | Trended           | Trended      | Trended                |
| Nugget                  | 0.015418361 | 0.001782568       | 0.001611758  | 0                      |
| Sill                    | 0.002902369 | 0.010901082       | 0.004095228  | 0.006998316            |
| Range                   | 0.9312157   | 1.198152          | 1.798028     | 0.8986704              |
| <b>2010</b>             |             |                   |              |                        |
| Spatial autocorrelation | Trended     | Trended           | Clustered    | Trended                |
| Nugget                  | 0           | 0.01044786        | 0            | 0.01955982             |
| Sill                    | 0.1884992   | 0.18751196        | 0.02849971   | 0.07767505             |
| Range                   | 0.8221483   | 0.9977894         | 0.2618964    | 1.135447               |
| <b>2011</b>             |             |                   |              |                        |
| Spatial autocorrelation | None        | Trended           | Trended      | Trended                |
| Nugget                  | 0.02082441  | 0                 | 0            | 0                      |

|       |         |             |             |            |
|-------|---------|-------------|-------------|------------|
| Sill  | 0       | 0.009436121 | 0.005866115 | 0.00221214 |
| Range | 0.96954 | 1.198615    | 1.797464    | 0.8987203  |

Table S3: Estimated number of anaemic school-aged children per district in Burundi, 2008–2011.

| District   | Number of anaemic school-aged children |        |        |       |
|------------|----------------------------------------|--------|--------|-------|
|            | 2008                                   | 2009   | 2010   | 2011  |
| Bubanza    | 8,504                                  | 5,051  | 8,922  | 4,005 |
| Buhiga     | 14,101                                 | 9,478  | 15,893 | 7,734 |
| Bururi     | 5,463                                  | 3,239  | 6,235  | 2,408 |
| Busoni     | 9,064                                  | 6,152  | 9,492  | 5,215 |
| Butezi     | 8,963                                  | 6,181  | 9,520  | 4,573 |
| Buye       | 10,549                                 | 7,054  | 11,072 | 5,487 |
| Cankuzo    | 6,562                                  | 4,584  | 6,786  | 3,764 |
| Cibitoke   | 8,885                                  | 5,056  | 8,284  | 3,833 |
| Fota       | 9,287                                  | 6,362  | 11,182 | 5,409 |
| Gahombo    | 9,068                                  | 5,892  | 9,977  | 4,521 |
| Gashoho    | 8,902                                  | 6,350  | 9,335  | 5,235 |
| Gihofi     | 7,927                                  | 5,265  | 8,203  | 3,911 |
| Gitega     | 14,474                                 | 10,046 | 16,612 | 7,811 |
| Giteranyi  | 12,955                                 | 9,016  | 13,510 | 7,492 |
| Isale      | 15,231                                 | 9,206  | 15,374 | 7,065 |
| Kabezi     | 9,441                                  | 6,101  | 10,000 | 5,128 |
| Kayanza    | 13,638                                 | 8,346  | 15,979 | 7,032 |
| Kibumbu    | 9,603                                  | 6,707  | 11,582 | 5,509 |
| Kibuye     | 13,285                                 | 8,900  | 15,350 | 6,821 |
| Kiganda    | 8,704                                  | 5,726  | 10,219 | 4,523 |
| Kinyinya   | 9,294                                  | 6,674  | 9,254  | 5,084 |
| Kiremba    | 15,455                                 | 10,604 | 16,186 | 8,545 |
| Kirundo    | 10,846                                 | 7,411  | 11,095 | 6,089 |
| Mabayi     | 10,736                                 | 6,145  | 11,247 | 4,767 |
| Makamba    | 12,279                                 | 8,112  | 12,793 | 6,273 |
| Matana     | 11,268                                 | 7,372  | 13,948 | 6,075 |
| Mpanda     | 7,364                                  | 4,407  | 7,405  | 3,331 |
| Mukenke    | 7,859                                  | 5,513  | 8,079  | 4,637 |
| Muramvya   | 7,411                                  | 4,642  | 8,963  | 3,889 |
| Murore     | 6,219                                  | 4,450  | 6,526  | 3,969 |
| Musema     | 13,372                                 | 8,450  | 15,509 | 6,577 |
| Mutaho     | 10,986                                 | 7,202  | 12,633 | 5,392 |
| Muyinga    | 15,034                                 | 10,794 | 15,814 | 8,695 |
| Ngozi      | 14,474                                 | 9,535  | 15,781 | 7,491 |
| Nyabikere  | 12,174                                 | 7,982  | 13,903 | 6,059 |
| Nyanza-Lac | 9,212                                  | 5,890  | 9,157  | 4,622 |
| Rumonge    | 11,755                                 | 7,489  | 12,096 | 5,730 |
| Rutana     | 8,994                                  | 5,953  | 9,723  | 4,330 |

|              |                |                |                |                |
|--------------|----------------|----------------|----------------|----------------|
| Ruyigi       | 5,979          | 4,185          | 6,276          | 3,244          |
| Rwibaga      | 8,121          | 5,473          | 9,599          | 5,022          |
| Ryansoro     | 7,475          | 4,934          | 9,265          | 3,980          |
| Vumbi        | 10,749         | 7,486          | 10,758         | 5,967          |
| ZONE-Centre  | 2,115          | 1,233          | 1,964          | 890            |
| ZONE-Nord    | 6,742          | 3,856          | 6,176          | 2,839          |
| ZONE-Sud     | 3,135          | 1,865          | 2,927          | 1,335          |
| <b>Total</b> | <b>443,657</b> | <b>292,370</b> | <b>480,605</b> | <b>232,304</b> |

Table S4: Estimated number of school-aged children with low- and moderate/high-severity anaemia per district in Burundi, 2008–2011.

|            | Low-severity anaemia |        |        |        | Moderate/high-severity anaemia |       |       |       |
|------------|----------------------|--------|--------|--------|--------------------------------|-------|-------|-------|
| District   | 2008                 | 2009   | 2010   | 2011   | 2008                           | 2009  | 2010  | 2011  |
| Bubanza    | 4,915                | 2,815  | 2,485  | 3,984  | 2,082                          | 3,639 | 4,323 | 2,177 |
| Buhiga     | 4,882                | 5,774  | 8,525  | 10,009 | 4,308                          | 3,359 | 2,993 | 1,156 |
| Bururi     | 3,299                | 1,799  | 127    | 54     | 1,476                          | 2,079 | 1,912 | 710   |
| Busoni     | 6,402                | 3,891  | 2,483  | 8,516  | 3,529                          | 5,695 | 6,421 | 4,578 |
| Butezi     | 2,351                | 5,724  | 781    | 565    | 4,812                          | 1,444 | 1,445 | 550   |
| Buye       | 3,473                | 8,655  | 6,743  | 7,586  | 7,523                          | 1,940 | 1,224 | 447   |
| Cankuzo    | 3,348                | 2,246  | 1,573  | 1,106  | 1,725                          | 2,836 | 3,029 | 1,335 |
| Cibitoke   | 2,862                | 5,149  | 2,633  | 7,600  | 4,394                          | 2,198 | 3,467 | 1,427 |
| Fota       | 7,066                | 2,268  | 2,641  | 2,251  | 1,678                          | 4,598 | 2,727 | 1,061 |
| Gahombo    | 2,494                | 6,930  | 4,757  | 4,252  | 5,748                          | 1,160 | 536   | 144   |
| Gashoho    | 4,341                | 3,989  | 5,420  | 8,626  | 3,235                          | 3,335 | 3,186 | 1,482 |
| Gihofi     | 2,950                | 4,253  | 3,092  | 2,466  | 3,579                          | 1,944 | 2,475 | 1,014 |
| Gitega     | 6,170                | 7,951  | 2,117  | 1,429  | 6,112                          | 2,959 | 912   | 239   |
| Giteranyi  | 7,837                | 4,964  | 3,284  | 7,176  | 4,235                          | 6,610 | 7,743 | 4,968 |
| Isale      | 7,041                | 6,201  | 9,960  | 10,284 | 5,334                          | 4,978 | 5,945 | 2,555 |
| Kabezi     | 6,619                | 2,017  | 6,299  | 5,605  | 1,628                          | 5,018 | 5,584 | 2,816 |
| Kayanza    | 13,000               | 5,231  | 8,027  | 9,488  | 4,138                          | 9,331 | 6,679 | 3,764 |
| Kibumbu    | 5,419                | 4,248  | 2,581  | 1,647  | 3,201                          | 2,803 | 967   | 236   |
| Kibuye     | 6,406                | 5,984  | 3,546  | 2,840  | 4,776                          | 3,258 | 1,997 | 645   |
| Kiganda    | 3,974                | 5,682  | 4,183  | 3,218  | 4,651                          | 2,358 | 1,205 | 436   |
| Kinyinya   | 2,296                | 3,251  | 774    | 454    | 2,678                          | 1,800 | 2,987 | 1,256 |
| Kiremba    | 5,423                | 11,544 | 13,071 | 17,721 | 10,028                         | 3,806 | 3,411 | 1,536 |
| Kirundo    | 6,643                | 5,588  | 2,906  | 13,373 | 5,126                          | 5,802 | 6,419 | 4,136 |
| Mabayi     | 7,786                | 6,489  | 4,884  | 8,937  | 5,884                          | 6,324 | 6,730 | 3,954 |
| Makamba    | 6,139                | 6,174  | 6,726  | 5,112  | 5,322                          | 4,220 | 4,426 | 2,016 |
| Matana     | 8,174                | 2,978  | 1,474  | 1,649  | 2,188                          | 5,202 | 2,739 | 978   |
| Mpanda     | 3,002                | 3,709  | 2,151  | 3,101  | 2,988                          | 2,147 | 2,640 | 1,070 |
| Mukenke    | 4,362                | 3,348  | 2,864  | 7,144  | 2,934                          | 3,662 | 4,476 | 2,835 |
| Muramvya   | 6,255                | 2,211  | 3,756  | 3,326  | 1,704                          | 4,363 | 3,494 | 1,674 |
| Murore     | 4,126                | 1,803  | 3,785  | 2,924  | 1,464                          | 3,691 | 4,376 | 2,480 |
| Musema     | 6,025                | 9,104  | 6,640  | 5,686  | 7,393                          | 3,433 | 1,921 | 695   |
| Mutaho     | 2,397                | 8,761  | 3,400  | 2,556  | 6,988                          | 1,199 | 580   | 151   |
| Muyinga    | 7,558                | 5,065  | 2,859  | 3,389  | 3,759                          | 6,108 | 6,111 | 2,726 |
| Ngozi      | 4,267                | 8,708  | 8,189  | 8,517  | 7,156                          | 1,999 | 1,185 | 348   |
| Nyabikere  | 2,658                | 7,203  | 2,970  | 2,973  | 5,521                          | 1,538 | 1,127 | 376   |
| Nyanza-Lac | 4,060                | 2,106  | 651    | 211    | 1,727                          | 2,464 | 3,512 | 1,318 |
| Rumonge    | 6,078                | 6,111  | 689    | 414    | 5,071                          | 4,296 | 3,582 | 1,352 |
| Rutana     | 4,866                | 3,124  | 2,361  | 1,916  | 2,604                          | 2,777 | 3,097 | 1,317 |
| Ruyigi     | 1,942                | 2,267  | 594    | 311    | 1,836                          | 1,410 | 1,793 | 759   |

|              |                |                |                |                |                |                |                |               |
|--------------|----------------|----------------|----------------|----------------|----------------|----------------|----------------|---------------|
| Rwibaga      | 9,308          | 513            | 7,389          | 7,316          | 382            | 7,753          | 7,474          | 4,414         |
| Ryansoro     | 4,089          | 3,478          | 2,149          | 1,498          | 2,709          | 2,160          | 1,030          | 336           |
| Vumbi        | 4,199          | 7,730          | 5,563          | 13,072         | 7,039          | 3,341          | 3,684          | 1,939         |
| Zone-Centre  | 555            | 1,070          | 1,014          | 1,111          | 954            | 373            | 586            | 186           |
| Zone-Nord    | 1,805          | 2,847          | 3,855          | 4,579          | 2,596          | 1,167          | 2,059          | 629           |
| Zone-Sud     | 765            | 1,043          | 782            | 820            | 848            | 511            | 813            | 231           |
| <b>Total</b> | <b>219,628</b> | <b>211,995</b> | <b>172,755</b> | <b>216,813</b> | <b>175,066</b> | <b>153,086</b> | <b>145,020</b> | <b>70,453</b> |

*Table S5: Values of the validation metrics used for the predictive maps of the prevalence of anaemia and of anaemia severity classes in school-aged children in Burundi, 2008–2011.*

| <b>Prevalence of anaemia</b>                        | <b>Mean prediction error</b> | <b>Absolute prediction error</b> |
|-----------------------------------------------------|------------------------------|----------------------------------|
| 2008                                                | -0.003                       | 0.222                            |
| 2009                                                | -0.005                       | 0.112                            |
| 2010                                                | -0.164                       | 0.184                            |
| 2011                                                | 0.027                        | 0.104                            |
| <b>Prevalence of low-severity anaemia</b>           |                              |                                  |
| 2008                                                | 0.063                        | 0.232                            |
| 2009                                                | 0.074                        | 0.120                            |
| 2010                                                | 0.086                        | 0.146                            |
| 2011                                                | 0.052                        | 0.220                            |
| <b>Prevalence of moderate/high-severity anaemia</b> |                              |                                  |
| 2008                                                | 0.122                        | 0.142                            |
| 2009                                                | -0.009                       | 0.107                            |
| 2010                                                | 0.006                        | 0.111                            |
| 2011                                                | 0.021                        | 0.046                            |

## Figures:

Semivariograms and maps for the standard deviation of the prevalence of anaemia and of anaemia severity in school-aged children in Burundi, 2008–2011, and tables with the predicted number of school-aged children with anaemia or in anaemia severity classes.

Figure S1: Semivariograms for the prevalence of anaemia in Burundi, 2008–2011

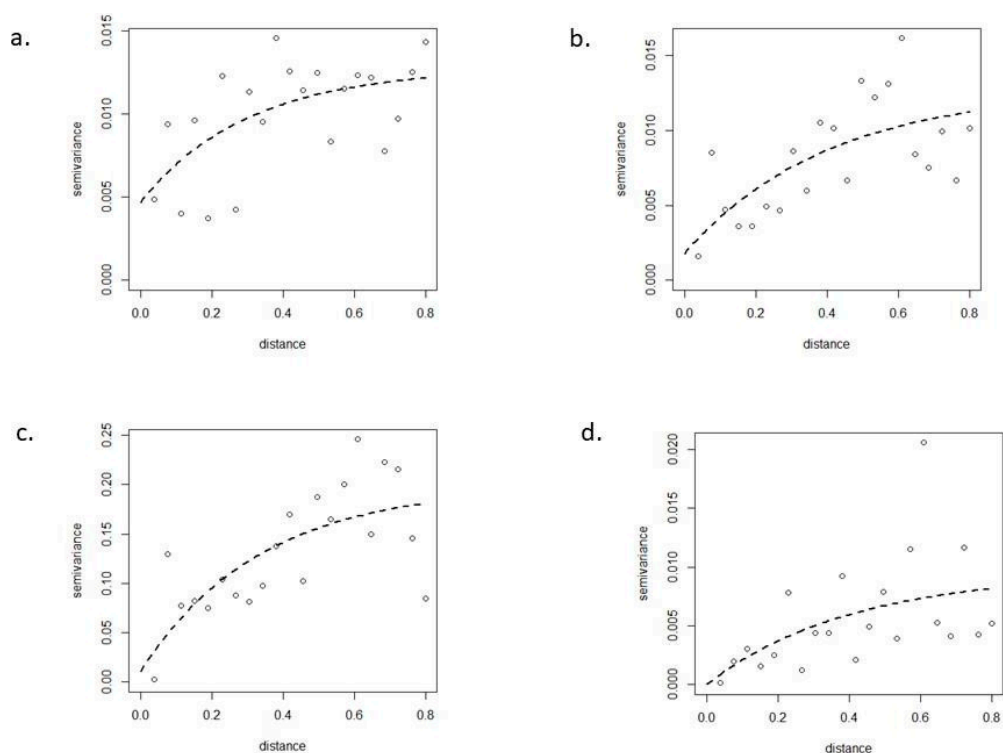

The y-axis represents the semivariance and the x-axis the distance (in decimal degrees). **(a)** 2008, **(b)** 2009, **(c)** 2010, **(d)** 2011.

Figure S2: Semivariograms for the prevalence of low-severity anaemia in Burundi, 2008–2011.

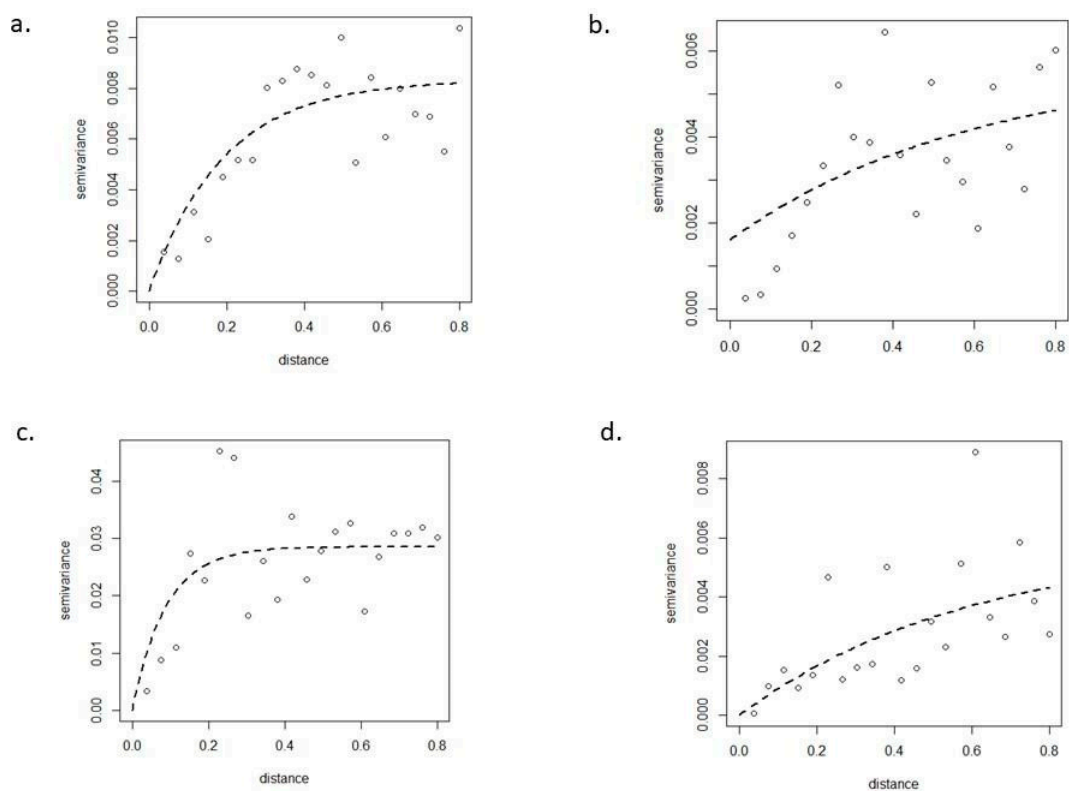

The y-axis represents the semivariance and the x-axis the distance (in decimal degrees). **(a)** 2008, **(b)** 2009, **(c)** 2010, **(d)** 2011.

Figure S3: Semivariograms for the prevalence of moderate/high-severity anaemia in Burundi, 2008–2011.

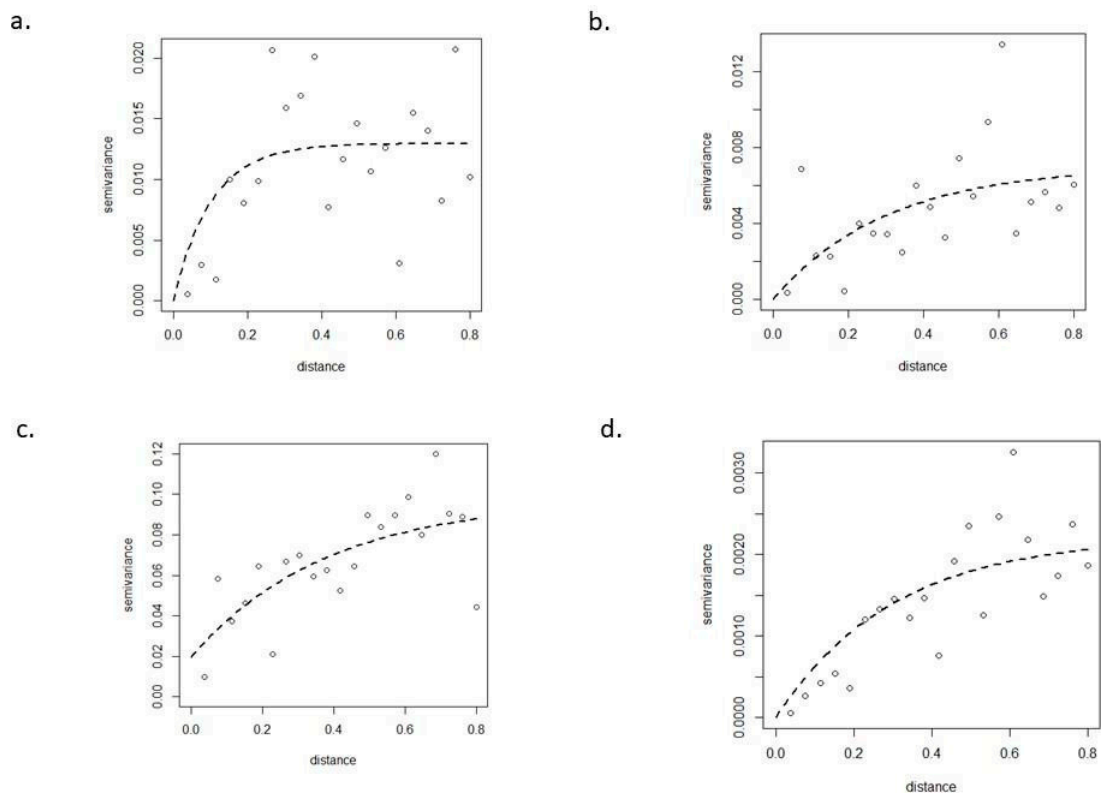

The y-axis represents the semivariance and the x-axis the distance (in decimal degrees). **(a)** 2008, **(b)** 2009, **(c)** 2010, **(d)** 2011.



Figure S4: Standard deviation maps of anaemia prevalence per year in Burundi, 2008–2011.

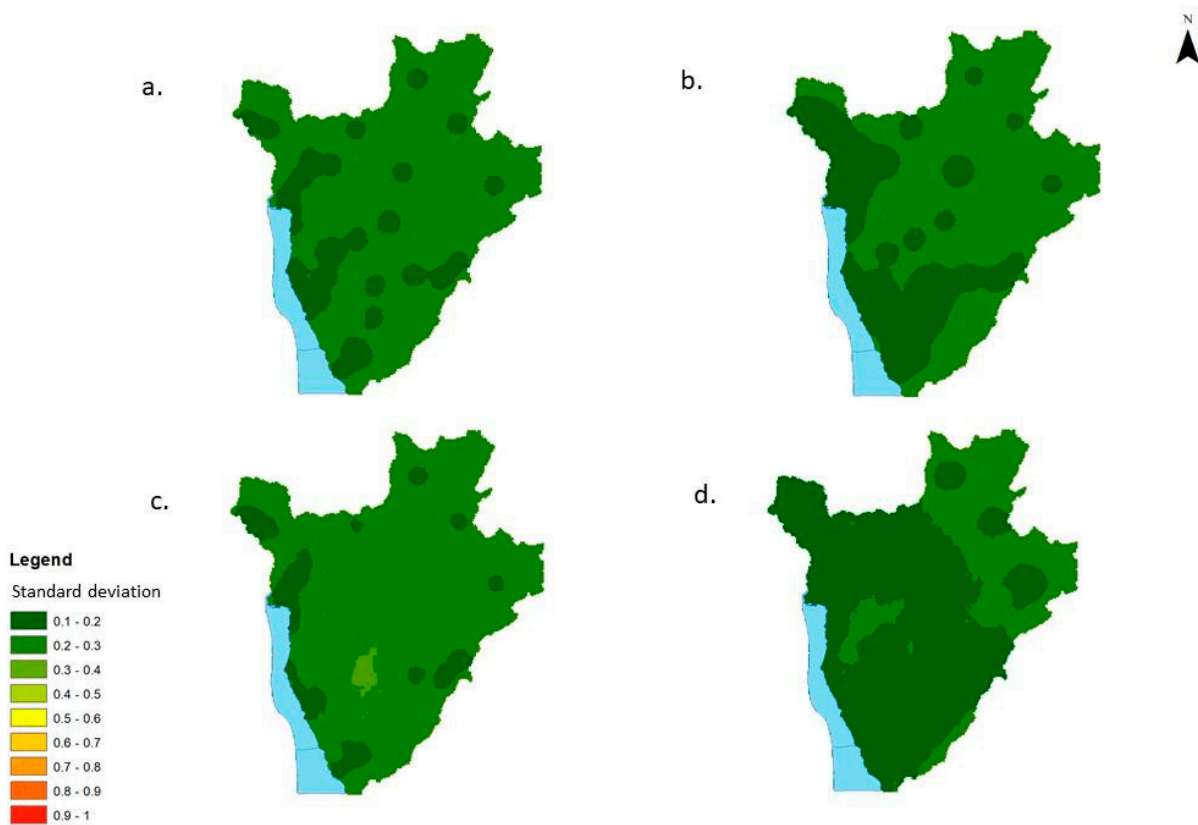

The intensity of the colour represents the magnitude of the standard deviation (see accompanying legend) for the proportion of school-aged children with anaemia (see Table 1 of main text for classification of anaemia according to the World Health Organization [1]). The pale blue colour depicts the location Lake Tanganyika. **(a)** 2008, **(b)** 2009, **(c)** 2010, **(d)** 2011.

Figure S5: Standard deviation maps for the prevalence of low-severity anaemia per year in Burundi, 2008–2011.

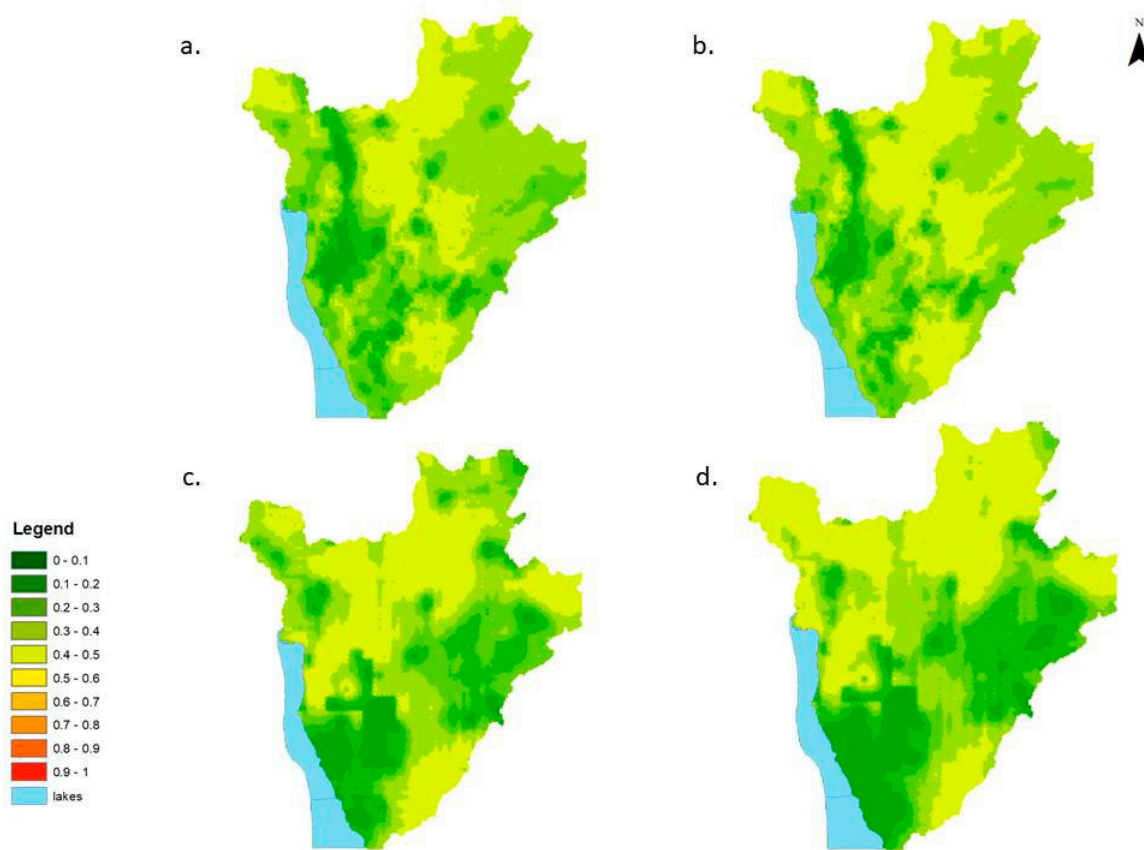

The intensity of the colour represents the magnitude of the standard deviation (see accompanying legend) for the proportion of school-aged children with low-severity anaemia (see Table 1 of main text for classification of anaemia and anaemia severity categories according to the World Health Organization [1]). The pale blue colour depicts the location of Lake Tanganyika. **(a)** 2008, **(b)** 2009, **(c)** 2010, **(d)** 2011.

Figure S6: Standard deviation maps for the prevalence of moderate/high-severity anaemia per year in Burundi, 2008–2011.

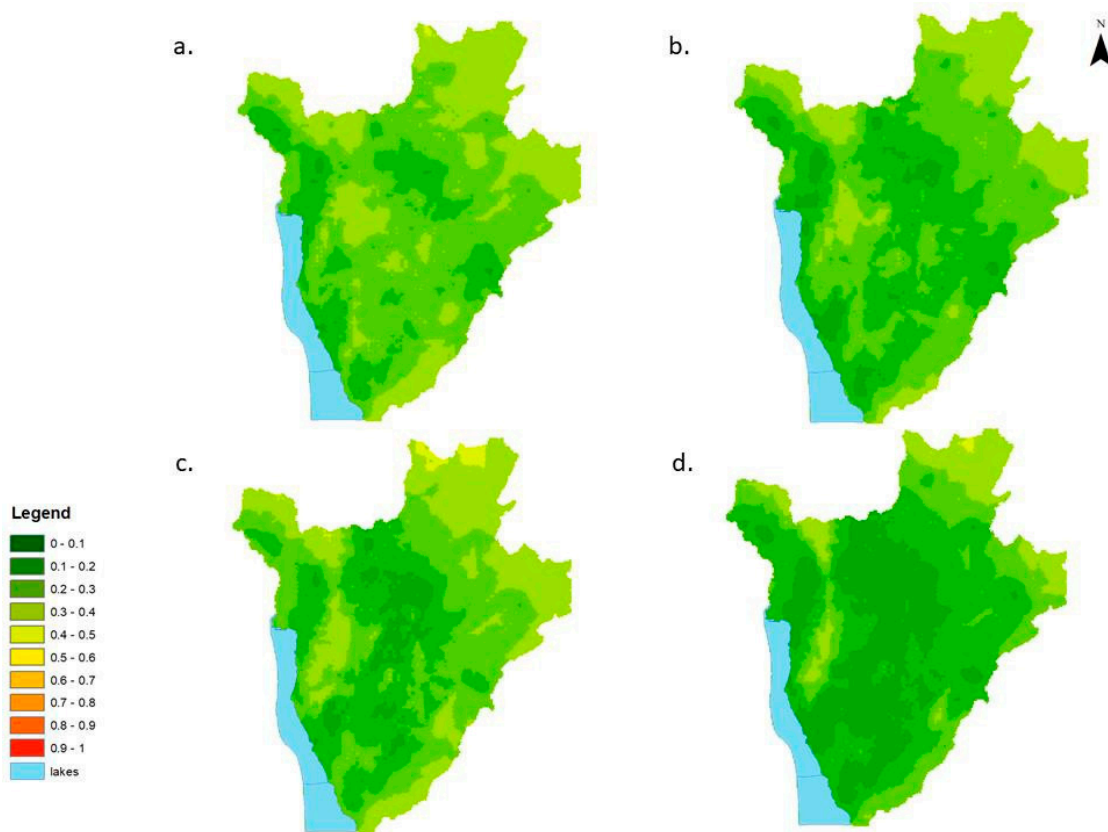

The intensity of the colour represents the magnitude of the standard deviation (see accompanying legend) for the proportion of school-aged children with moderate- and high-severity anaemia (see Table 1 of main text for classification of anaemia and anaemia severity categories according to the World Health Organization [1]). The pale blue colour depicts the location of Lake Tanganyika. **(a)** 2008, **(b)** 2009, **(c)** 2010, **(d)** 2011.

**Annex Reference**

1. World Health Organization. Iron deficiency anaemia: assessment, prevention and control. A guide for programme managers. 2001; WHO/NHD/01.3. Available: <http://www.who.int/vmnis/indicators/haemoglobin.pdf> (accessed 30 May 2018).
